# Supplementary material for: Facile synthesis of porous Li-rich layered Li[Li0.2Mn0.534Ni0.133Co0.133]O2 as high-performance cathode materials for Li-ion batteries
Source: Royal Society of Chemistry journal article supplement (doi:10.1039/c5ra03445k), 2015-01-01
Supplement: c5ra03445k1.pdf [file c5ra03445k1.pdf]

**Supplementary information**

**Facile synthesis of porous Li-rich layered  
Li[Li<sub>0.2</sub>Mn<sub>0.534</sub>Ni<sub>0.133</sub>Co<sub>0.133</sub>]O<sub>2</sub> as high-performance cathode  
materials for Li-ion batteries**

**Chenwei Cao<sup>a</sup>, Liujiang Xi<sup>ab</sup>, Kwan Lan Leung<sup>a</sup>, Man Wang<sup>a</sup>, Ying Liu<sup>a</sup>, Ruguang Ma<sup>a</sup>,  
Shiliu Yang<sup>a</sup>, Zhouguang Lu<sup>\*c</sup> and C. Y. Chung<sup>\*a</sup>**

<sup>a</sup> Department of Physics and Materials Science, City University of Hong Kong, Hong Kong SAR, PR China. Fax: +852 34420538; Tel: +852 34427835; E-mail:

[luzg@sustc.edu.cn](mailto:luzg@sustc.edu.cn) (LZG), [appchung@cityu.edu.hk](mailto:appchung@cityu.edu.hk) (CYC)

<sup>b</sup> School of Metallurgical Engineering, Hunan University of Technology

<sup>c</sup> Department of Materials Science & Engineering, South University of Science and Technology of China, Shenzhen, PR China.

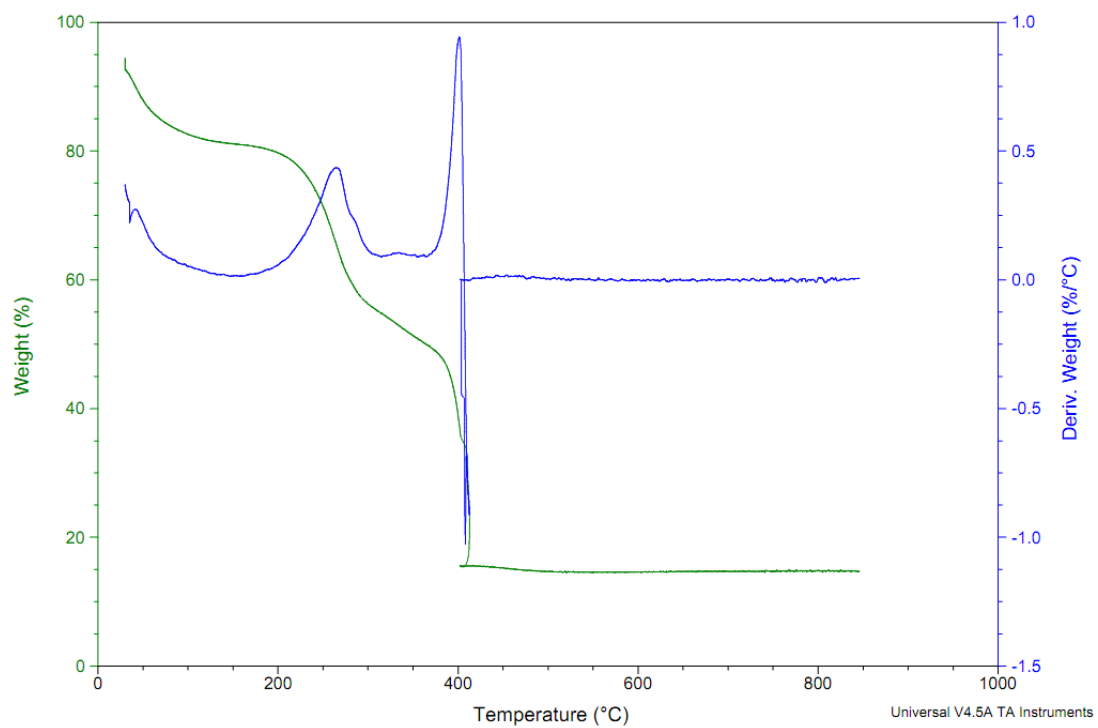

**Fig. S1** TGA curves of the polymer-based precursor in the heating range 20 - 800°C.

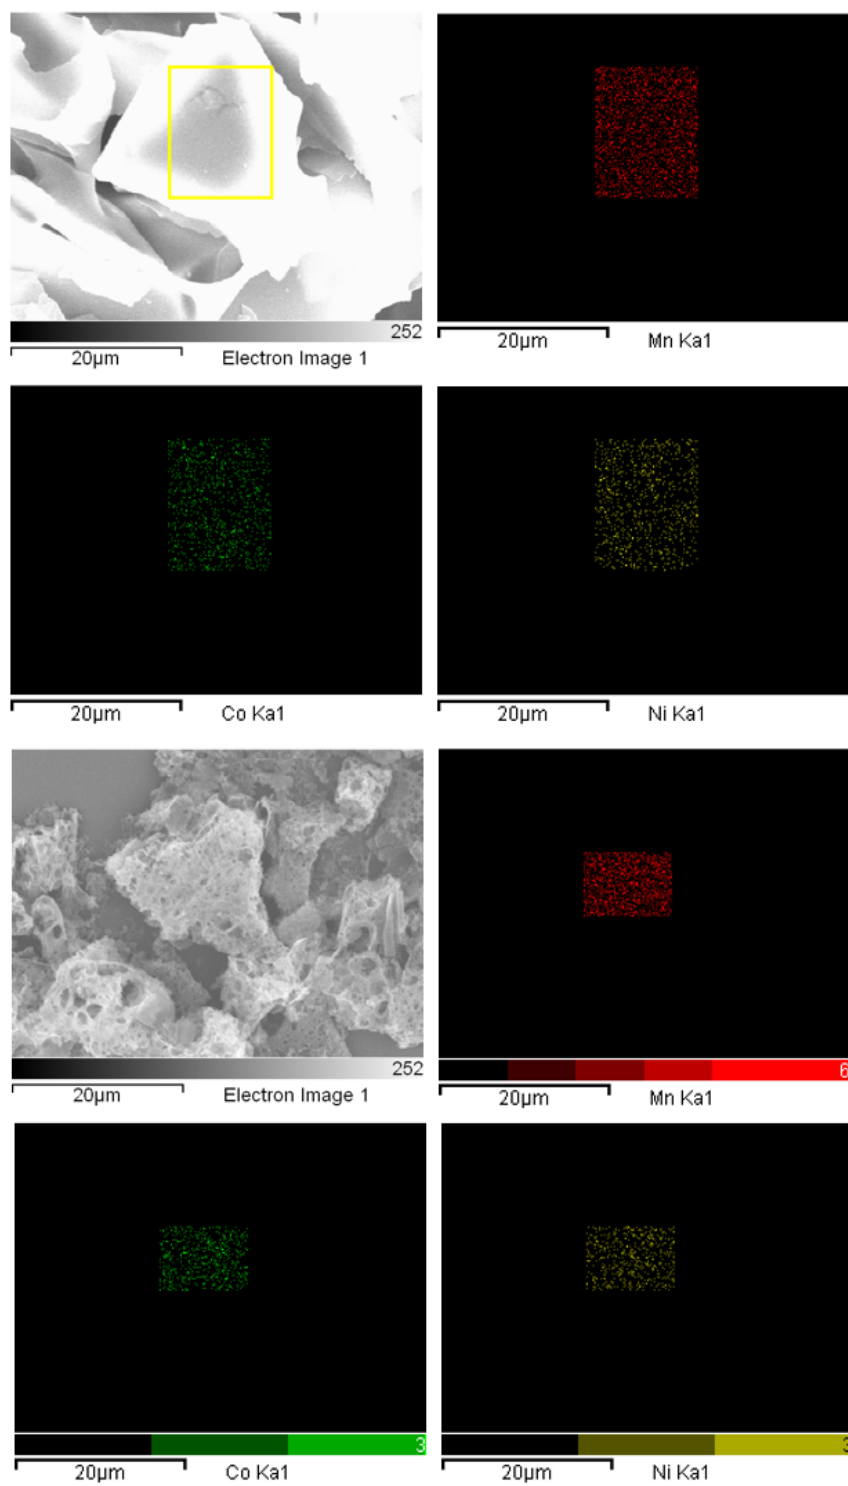

**Fig. S2** EDS elemental mapping of the precursor and the  $\text{Li}[\text{Li}_{0.2}\text{Mn}_{0.534}\text{Ni}_{0.133}\text{Co}_{0.133}]\text{O}_2$  layered oxides calcined at 750°C.

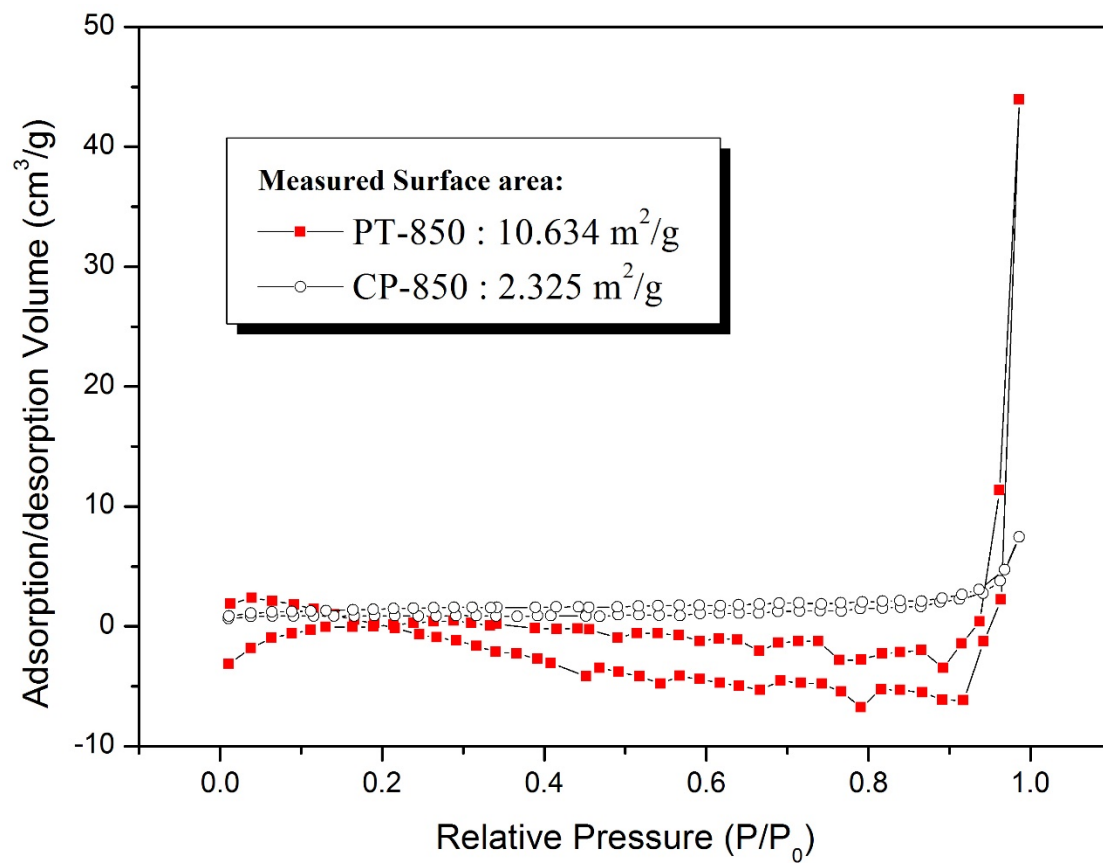

Fig. S3 N<sub>2</sub> adsorption/desorption isotherms of the sample PT-850 and CP-850.

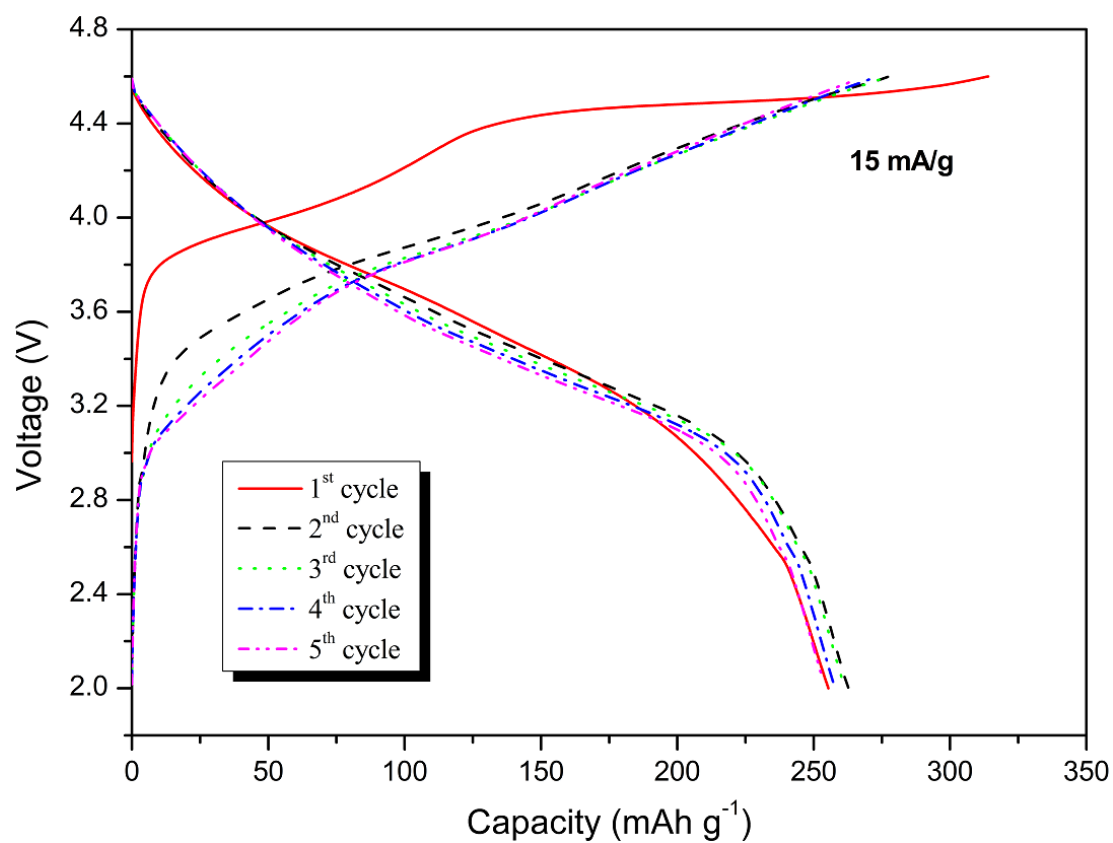

**Fig. S4** Charge-discharge curves of sample PT-850 of the first five cycles at a current density of 15 mA g<sup>-1</sup>.

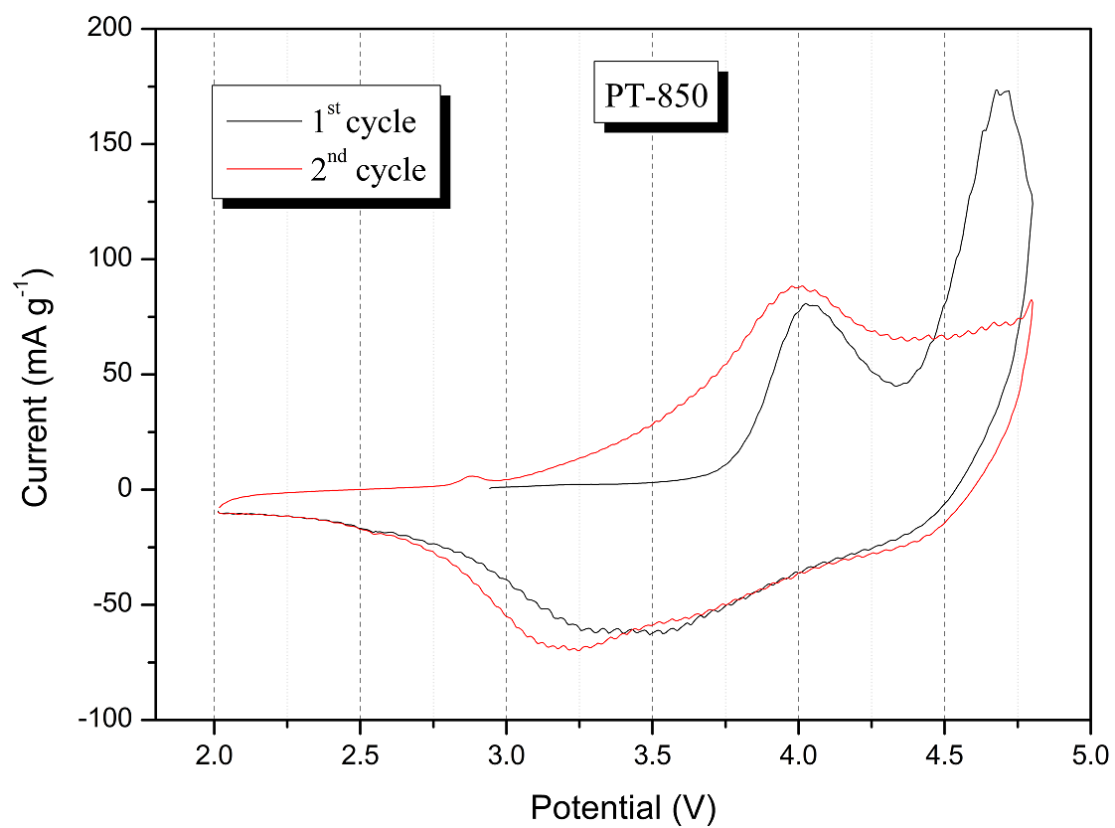

**Fig. S5** Cyclic voltammetry (CV) curves of sample PT-850 of the first two cycles at a scan rate of  $0.1 \text{ mV s}^{-1}$  between 2 and 4.8 V.

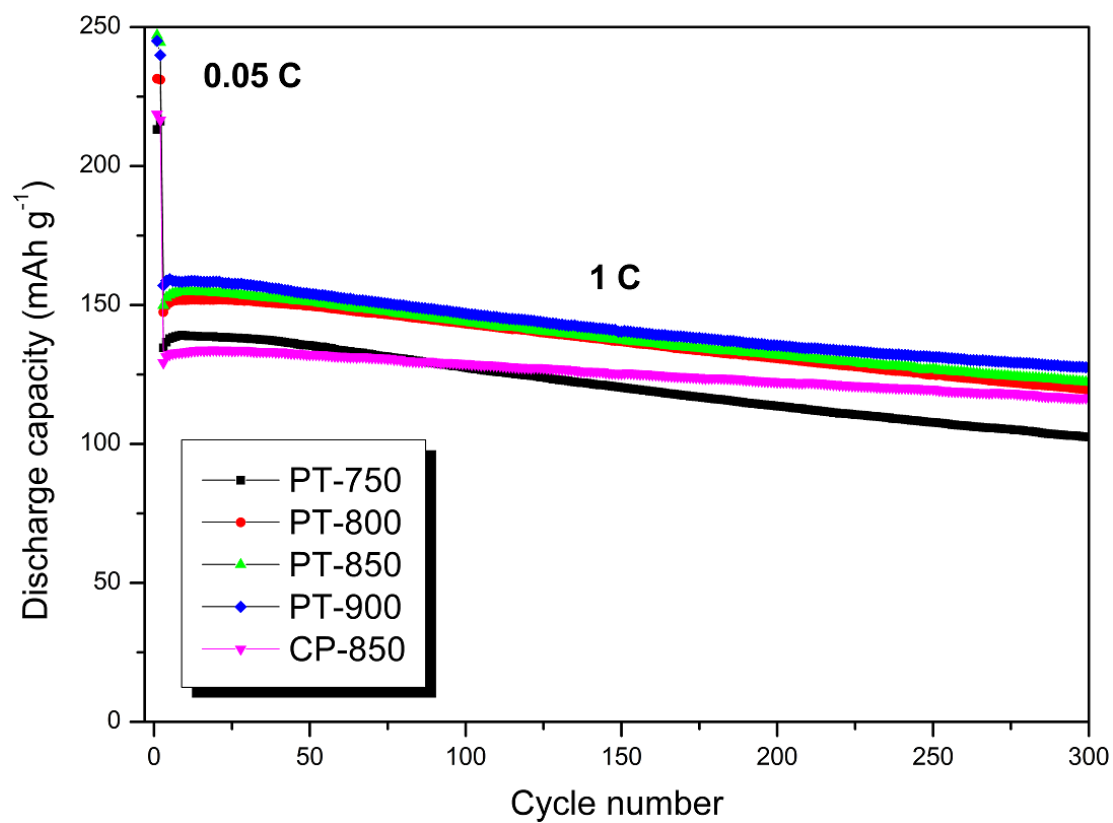

**Fig. S6** Cyclic performance of the as-synthesized samples at 300 mA g<sup>-1</sup> (1C) between 2 and 4.6 V.
